# Supplementary material
Source: PubMed Central journal article supplement (PMC1994124)
Supplement: 7601823s1.pdf [file 7601823s1.pdf]

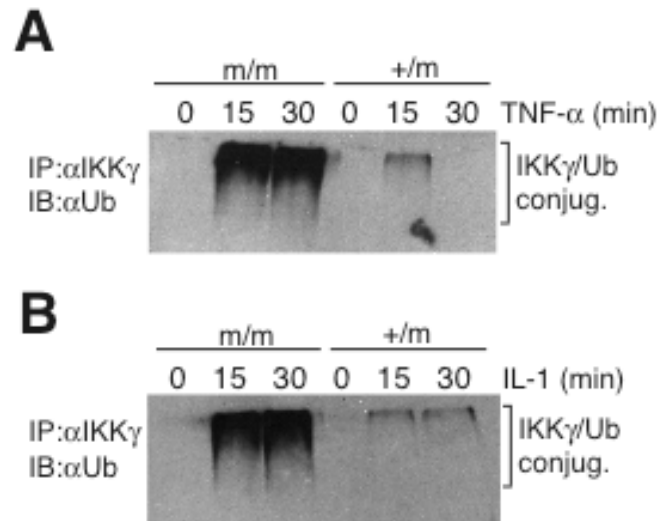

**Supplementary Figure S1** Enhanced IKK $\gamma$  ubiquitination in TAX1BP1<sup>m/m</sup> MEFs. TAX1BP1<sup>m/m</sup> and TAX1BP1<sup>+m</sup> MEFs were treated with TNF- $\alpha$  (20 ng/ml) in (A) or IL-1 (20 ng/ml) in (B) for 15 and 30 min. Cells were lysed and IKK $\gamma$  was immunoprecipitated with anti-IKK $\gamma$  followed by immunoblotting with anti-ubiquitin.
